# Supplementary material for: Mapping the Regulatory Network for Salmonella enterica Serovar Typhimurium Invasion
Source: PubMed Central journal article supplement (PMC5013294; doi:10.1128/mbio.01024-16), 2016-09-06

# Figure S1

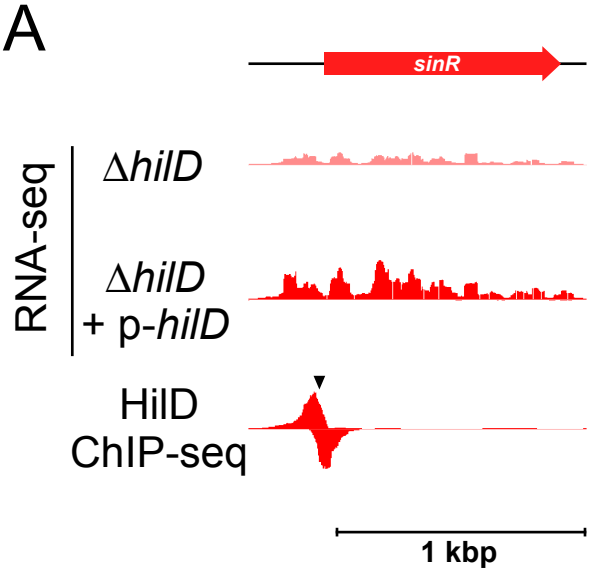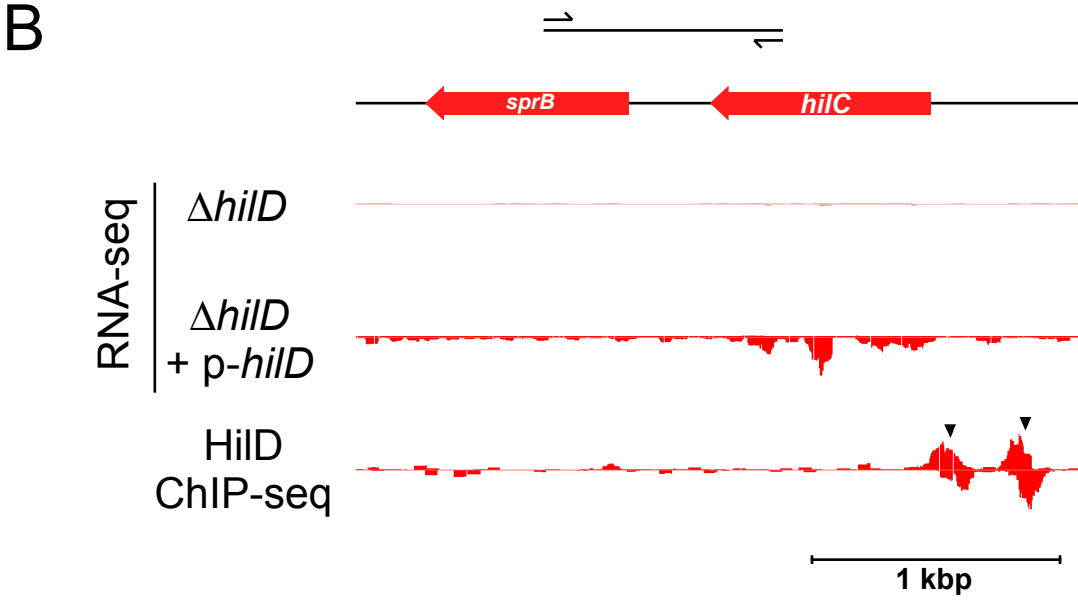

Figure S1

C

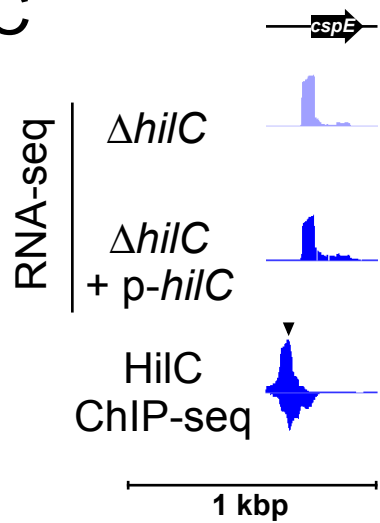

D

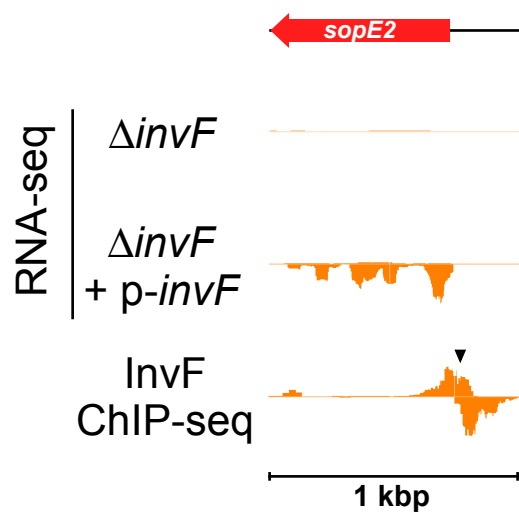

E

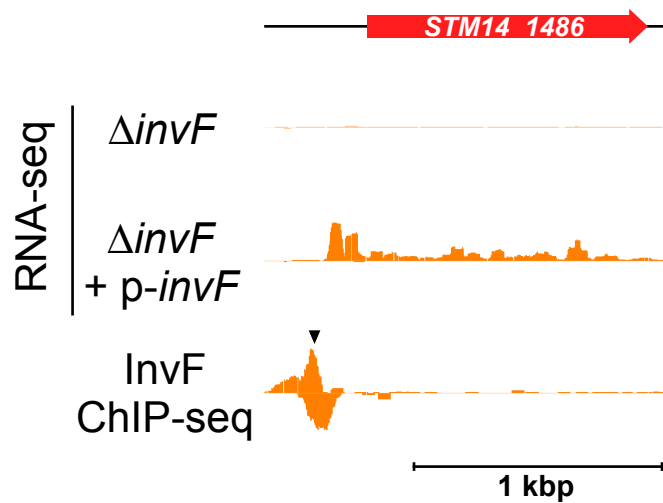

# Figure S1

## F

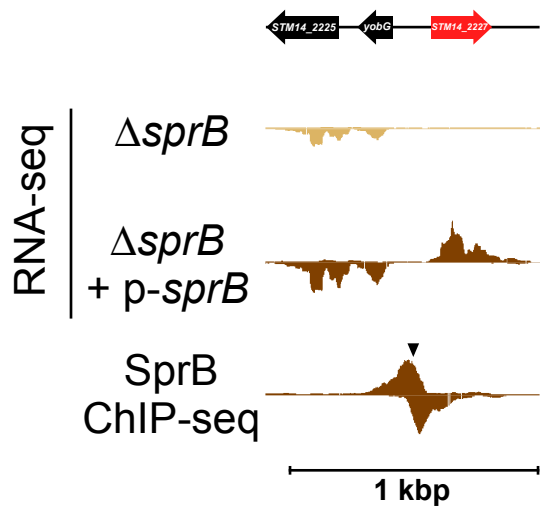

## G

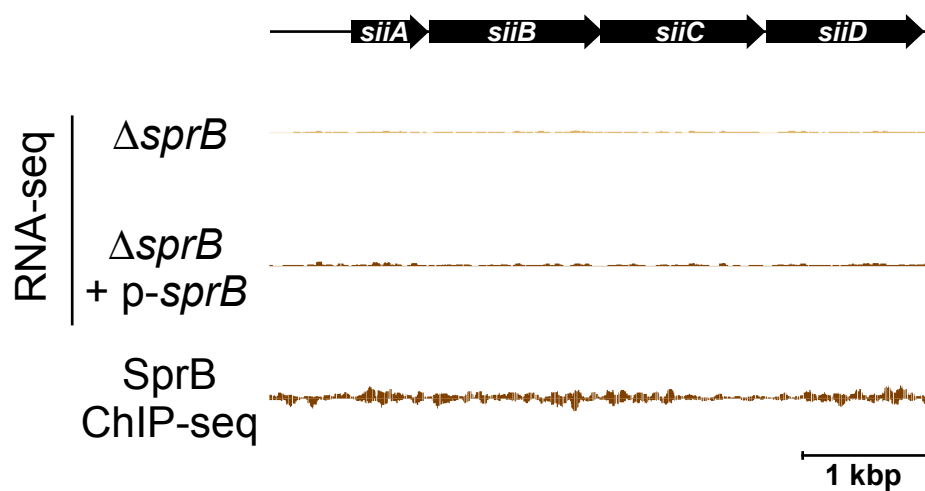

# Figure S1

## H

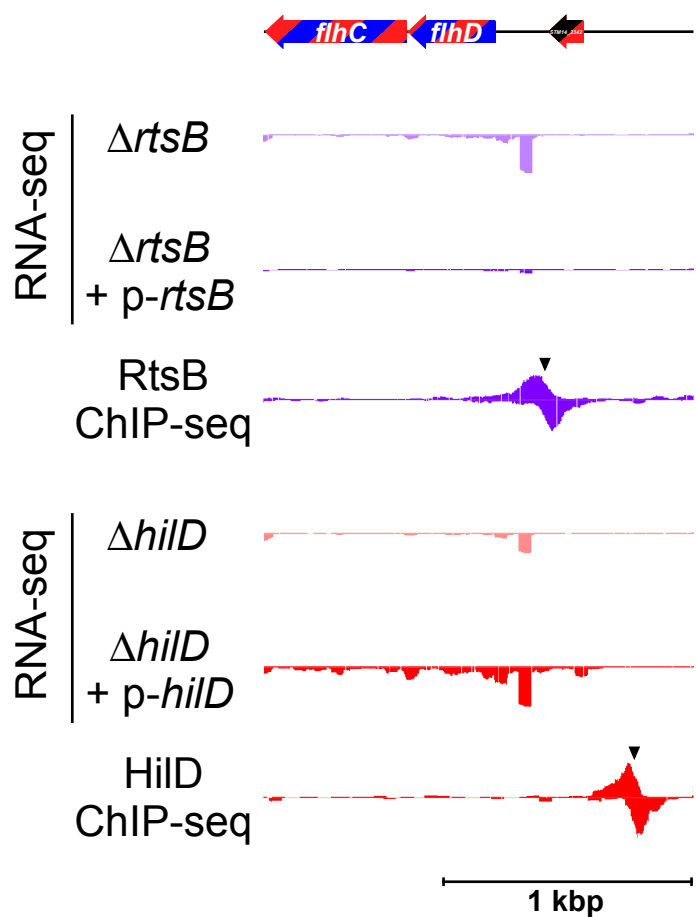

## I

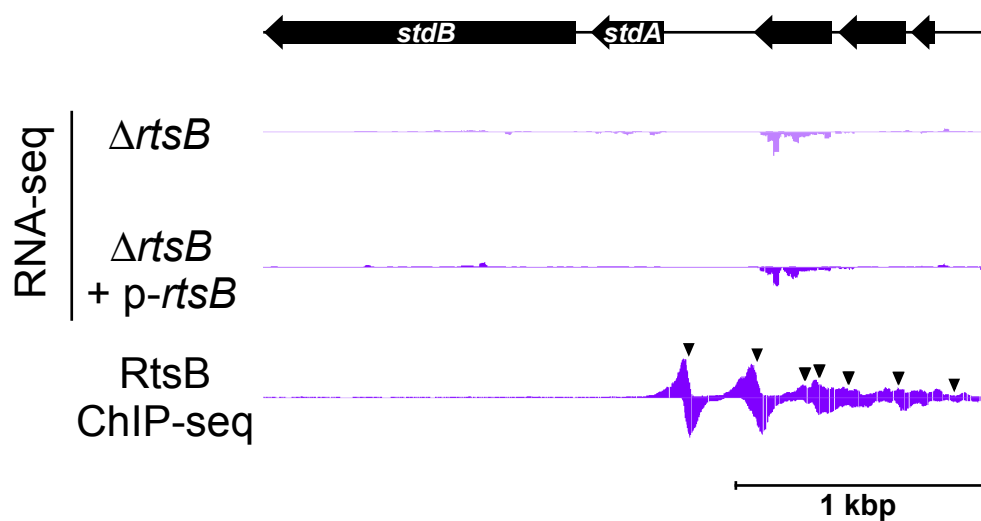

# Figure S1

J

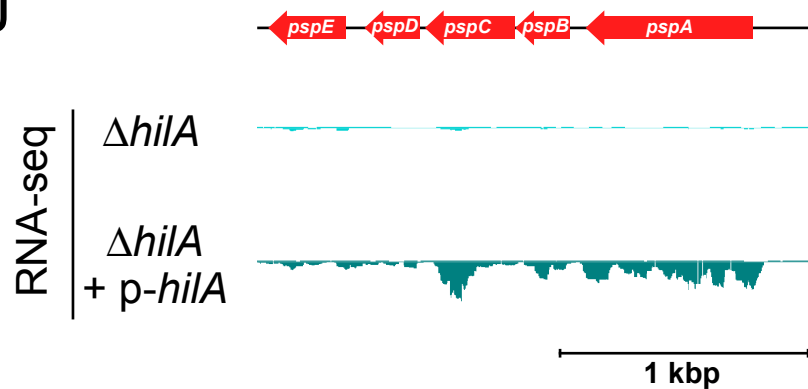

K

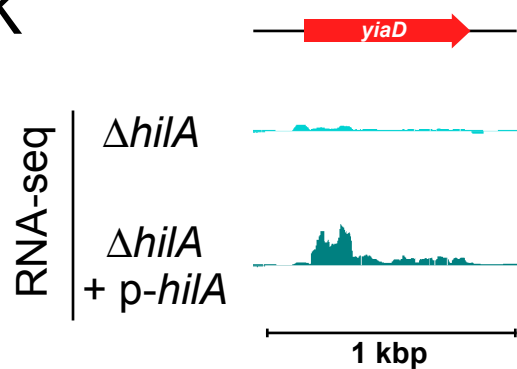

L

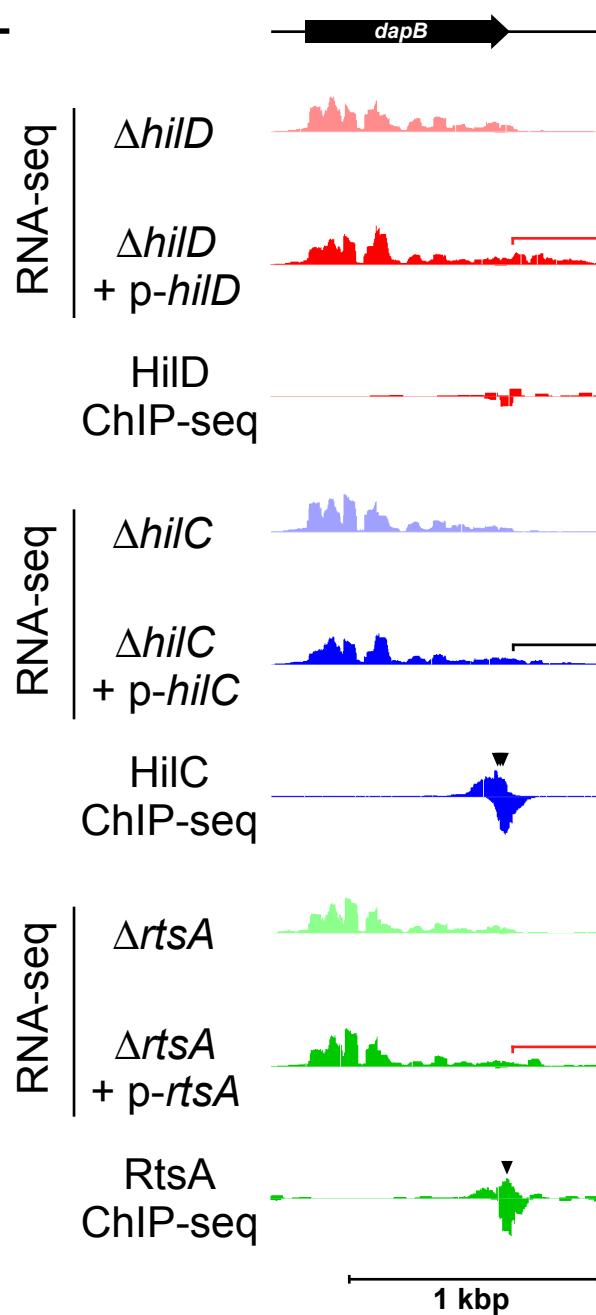

Supplement: mbo004162976sf1.pdf [file mbo004162976sf1.pdf]
