# Supplementary material for: Mapping the Regulatory Network for Salmonella enterica Serovar Typhimurium Invasion
Source: PubMed Central journal article supplement (PMC5013294; doi:10.1128/mbio.01024-16), 2016-09-06
Supplement: mbo004162976sf3.pdf [file mbo004162976sf3.pdf]

# Figure S3

|                      |                                                    |
|----------------------|----------------------------------------------------|
| <i>sopE2</i>         | TGGTTGTGGAGAAGGTGGCTATTTTTTGGAAAGCAAGAAATATAAACAA▲ |
| <i>STM14_1486</i>    | TAATAATGTGTGATTTGGCTATTTTTTGGAAAGTGCCTTACCAGATTTA▲ |
| <i>sicA</i>          | TAGCGATGTATTCATTGGGCGTTTTTTGAATGTTCACTAACCACCGTC   |
| <i>sopB</i>          | GTTTCCTCATTAAAAGGACATTTTTTAAAGTTCCTGGTGCATAAAA     |
| <i>sopE (SL1344)</i> | TCCTCCTGAGCGAAAAGGACTTTTTTTGAAAGTTTCTGAAAATAAAA    |
