# Supplementary material for: Mapping the Regulatory Network for Salmonella enterica Serovar Typhimurium Invasion
Source: PubMed Central journal article supplement (PMC5013294; doi:10.1128/mbio.01024-16), 2016-09-06

Figure S4

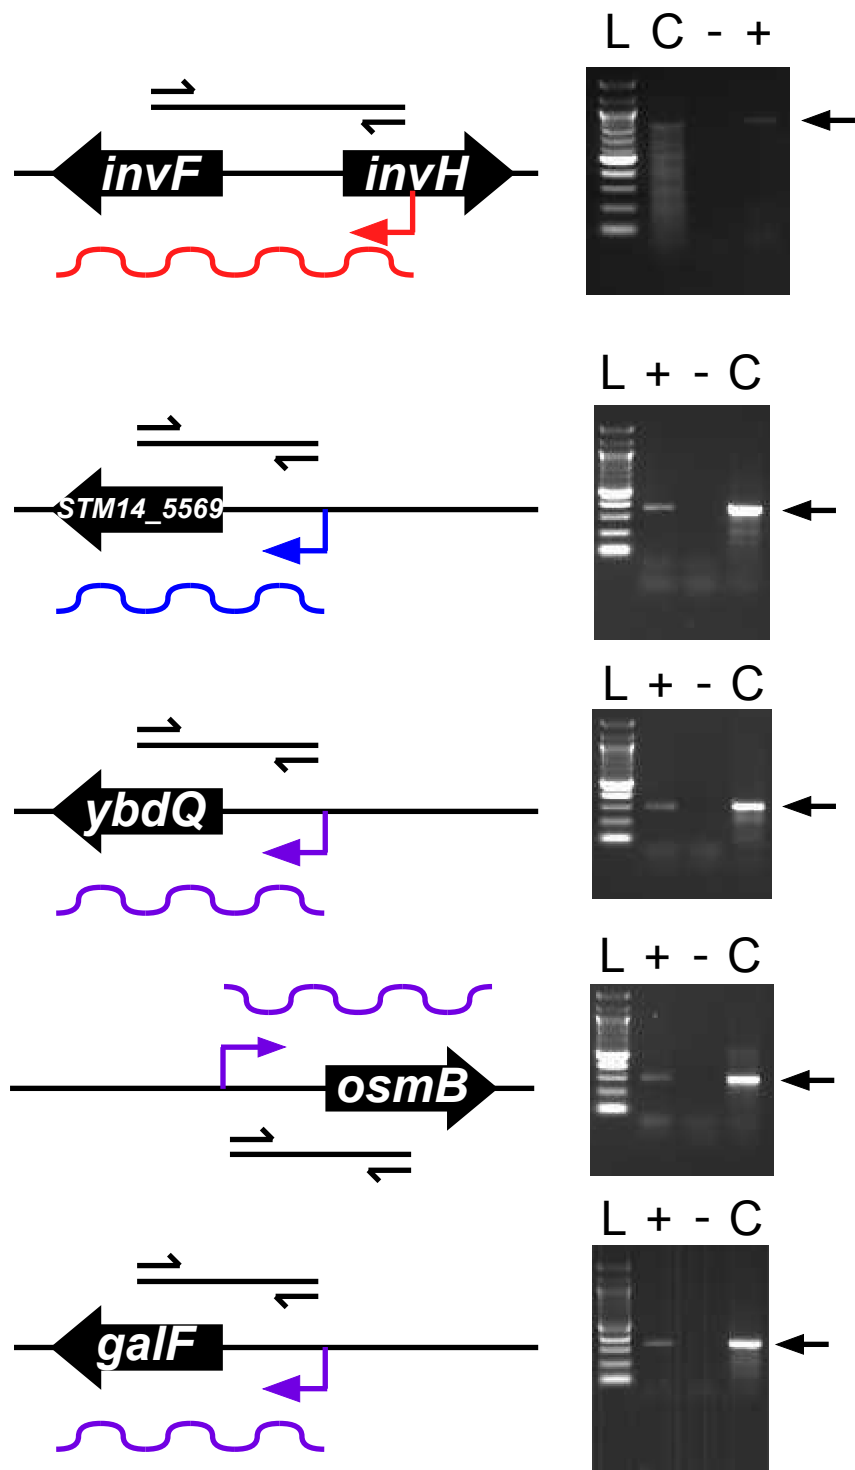

Supplement: mbo004162976sf4.pdf [file mbo004162976sf4.pdf]
